# Supplementary material
Source: ML conference proceedings conference paper supplement (https://openaccess.thecvf.com/content/WACV2025/html/Palenzuela_Importance-Guided_Interpretability_and_WACV_2025_paper.html)
Supplement: Supplementary file 1 [file Palenzuela_Importance-Guided_Interpretability_and_WACV_2025_supplemental.pdf]

## SUPPLEMENTARY MATERIAL

# Importance-Guided Interpretability and Pruning for Video Transformers in Driver Action Recognition

### A. Ablation Study on Importance Metric

To determine the most effective metric for quantifying layer relevance, we conducted an ablation study comparing JSD,  $\Delta\text{Prob}$ , and the R score, which is the average of the first two metrics. As shown in Tab. 1, the accuracy values across different cases, particularly in the DAI dataset, are quite similar regardless of the metric used. This consistency is especially evident when pruning high-relevance layers, where all three metrics yield nearly identical accuracy scores across different datasets and architectures. This is because all three metrics effectively identify and agree on the high-relevance layers. However, a slight difference emerges when removing low-relevance layers: JSD tends to perform the worst, while the R score delivers the best results, closely followed by the  $\Delta\text{Prob}$  metric. These findings suggest that while all metrics are reliable for identifying critical layers, the R score offers a slight edge in preserving accuracy when pruning less important layers.

| Model                            | Pruned Layer Relevance | Importance Metric   | UCF101 | DAI   |
|----------------------------------|------------------------|---------------------|--------|-------|
| TimeSformer<br>(3 layers pruned) | Lowest                 | JSD                 | 57.88  | 52.75 |
|                                  |                        | $\Delta\text{Prob}$ | 58.21  | 52.75 |
|                                  |                        | R                   | 58.43  | 52.75 |
|                                  | Highest                | JSD                 | 1.24   | 2.17  |
|                                  |                        | $\Delta\text{Prob}$ | 1.24   | 2.17  |
|                                  |                        | R                   | 1.24   | 2.17  |
| Video Swin<br>(6 layers pruned)  | Lowest                 | JSD                 | 83.08  | 88.04 |
|                                  |                        | $\Delta\text{Prob}$ | 85.12  | 88.04 |
|                                  |                        | R                   | 86.07  | 88.04 |
|                                  | Highest                | JSD                 | 4.62   | 3.26  |
|                                  |                        | $\Delta\text{Prob}$ | 4.62   | 3.26  |
|                                  |                        | R                   | 4.62   | 3.26  |
| MViT (5 layers pruned)           | Lowest                 | JSD                 | 90.11  | 86.15 |
|                                  |                        | $\Delta\text{Prob}$ | 91.11  | 86.96 |
|                                  |                        | R                   | 91.11  | 86.96 |
|                                  | Highest                | JSD                 | 30.11  | 25.00 |
|                                  |                        | $\Delta\text{Prob}$ | 28.07  | 25.00 |
|                                  |                        | R                   | 28.07  | 25.00 |

Table 1. Comparison of Top-1 accuracy outcomes when pruning layers based on different importance metrics (JSD,  $\Delta\text{Prob}$ , and R score) across various datasets and architectures.

### B. Specialized Head Generalization

Within the DAI dataset, we also identify layer 22, head 4 as important due to its consistently high relevance score across all test samples. This head consistently attends to the driver’s head, regardless of the video class (see first row in

Fig. 1). Interestingly, the attention patterns of this head can generalize across datasets. For instance, in UCF101, layer 22, head 7 is the most important for the “PlayingViolin” class, as it seeks violins (see lower part, second column in Fig. 1). However, when we apply the model trained on DAI, with layer 22, head 4 specialized in focusing on the head of the person, it successfully generalizes (see lower part, last column in Fig. 1).

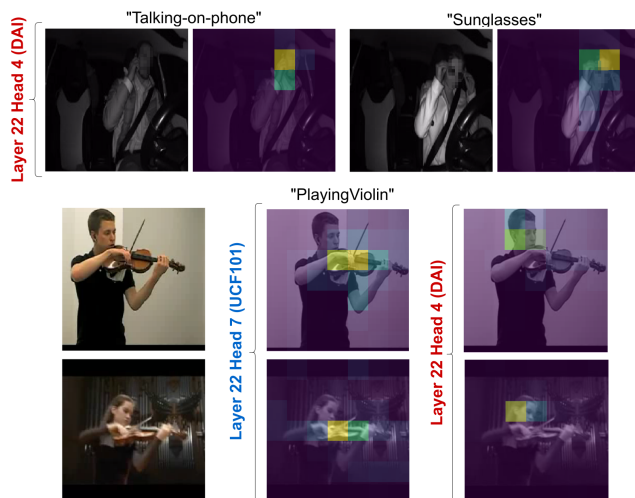

Figure 1. Attention maps of a specialized head using Video Swin that generalizes across datasets. In the upper part (first row), a specialized head on DAI consistently focuses on the driver’s head, regardless of the video class. Additionally, in the lower part, second column, we show a head trained on UCF101 to detect violins. For the same violin samples, the DAI-trained head successfully generalizes by detecting the person’s head, as shown in the lower part, last column. Colormap: viridis (dark blue: low attention, bright yellow: high attention). Best viewed in color.
